# Supplementary material for: AMMI and GGE biplot analysis for genotype × environment interactions affecting the yield and quality characteristics of sugar beet
Source: PeerJ. 2024 Feb 22;12:e16882. doi: 10.7717/peerj.16882 (PMC10894595; doi:10.7717/peerj.16882)
Supplement: Supplemental Information 3 [file peerj-12-16882-s003.xls]

## Sheet: Sheet1
	env	gen	root yield
	E1	G1	48598.5	40795.5	44621.2
		G2	58977.3	69431.8	44128.8
		G3	44924.2	40189.4	43977.3
		G4	31590.9	42878.8	50151.5
		G5	66666.7	64053	59356.1
		G6	39507.6	40303	43636.4
		G7	27765.2	25947	22727.3
		G8	42575.8	40492.4	37537.9
		G9	60643.9	61098.5	59318.2
		G10	20037.9	19734.8	25151.5
		G11	29856.1	31477.3	37386.4
		G12	57121.2	57992.4	58106.1
		G13	51174.2	45037.9	52121.2
		G14	45871.2	53750	59507.6
		G15	46174.2	33712.1	44545.5
		G16	67121.2	67462.1	73901.5
	E2	G1	58153.8	66615.4	63538.5
		G2	63538.5	67692.3	60769.2
		G3	73846.2	65076.9	62000
		G4	63692.3	69076.9	66153.8
		G5	57384.6	61692.3	60769.2
		G6	66000	75230.8	68923.1
		G7	58153.8	67076.9	64307.7
		G8	63230.8	66923.1	63076.9
		G9	55230.8	63538.5	58461.5
		G10	55846.2	60000	60000
		G11	67846.2	63230.8	65846.2
		G12	61230.8	57846.2	62307.7
		G13	61538.5	63846.2	62769.2
		G14	55384.6	55384.6	54615.4
		G15	63692.3	72307.7	63846.2
		G16	67692.3	70923.1	67384.6
	E3	G1	36538.5	42923.1	39569.2
		G2	57384.6	54507.7	64861.5
		G3	41661.5	42000	40153.8
		G4	43338.5	33261.5	31892.3
		G5	39107.7	28692.3	46123.1
		G6	32184.6	47307.7	40446.2
		G7	29138.5	30276.9	21384.6
		G8	36815.4	45107.7	39400
		G9	35046.2	55600	57569.2
		G10	55723.1	42184.6	52661.5
		G11	45815.4	49123.1	43230.8
		G12	25553.8	29169.2	22892.3
		G13	47876.9	56923.1	36200
		G14	42276.9	38907.7	25384.6
		G15	37323.1	26461.5	42061.5
		G16	35123.1	21123.1	47661.5
	E4	G1	50378.8	57992.4	68181.8
		G2	77840.9	60568.2	71666.7
		G3	87878.8	64621.2	79772.7
		G4	79848.5	68787.9	71250
		G5	55492.4	57992.4	60303
		G6	84393.9	82462.1	84015.2
		G7	65530.3	64280.3	64015.2
		G8	50606.1	50568.2	63409.1
		G9	67613.6	82348.5	98219.7
		G10	56931.8	81212.1	74924.2
		G11	51477.3	55000	57992.4
		G12	79924.2	67234.8	80947
		G13	63787.9	72803	64469.7
		G14	71098.5	78143.9	60947
		G15	78977.3	66666.7	54924.2
		G16	73106.1	70719.7	61174.2
	E5	G1	63769.2	68923.1	73692.3
		G2	79461.5	88461.5	83076.9
		G3	67923.1	71615.4	70384.6
		G4	68692.3	73307.7	68384.6
		G5	60384.6	53923.1	53000
		G6	68846.2	68384.6	70461.5
		G7	73692.3	72615.4	75230.8
		G8	75000	63000	74846.2
		G9	66846.2	60769.2	65615.4
		G10	76076.9	74846.2	78769.2
		G11	75307.7	83846.2	7307.69
		G12	70846.2	74538.5	60769.2
		G13	81923.1	76615.4	73384.6
		G14	69846.2	67692.3	58307.7
		G15	80384.6	71230.8	84230.8
		G16	69153.8	74923.1	68923.1
	E6	G1	48160	48160	44260
		G2	67920	59000	63000
		G3	61880	46320	60160
		G4	61560	54560	78720
		G5	47760	43800	45520
		G6	63480	65560	70160
		G7	48280	55200	61560
		G8	58200	62000	68000
		G9	55880	51540	61640
		G10	63480	55760	67520
		G11	72080	65360	65600
		G12	61840	45960	51720
		G13	61880	48320	51560
		G14	76680	61520	74320
		G15	72800	60280	71480
		G16	54920	42920	44720
	E7	G1	13250	19208.3	17208.3
		G2	16250	30250	25750
		G3	21750	22291.7	18958.3
		G4	18291.7	22291.7	22083.3
		G5	17958.3	20291.7	13958.3
		G6	21416.7	20250	19208.3
		G7	21291.7	21708.3	15000
		G8	23958.3	25250	22791.7
		G9	19708.3	22833.3	19833.3
		G10	19041.7	16000	15333.3
		G11	18500	22625	17875
		G12	21583.3	24166.7	24750
		G13	21375	22083.3	20833.3
		G14	19416.7	16791.7	19708.3
		G15	14958.3	24208.3	22333.3
		G16	21041.7	15125	16416.7
