# Supplementary material for: AMMI and GGE biplot analysis for genotype × environment interactions affecting the yield and quality characteristics of sugar beet
Source: PeerJ. 2024 Feb 22;12:e16882. doi: 10.7717/peerj.16882 (PMC10894595; doi:10.7717/peerj.16882)
Supplement: Supplemental Information 4 [file peerj-12-16882-s004.xls]

## Sheet: Sheet1
env	gen	sugar content
E1	G1	13.545	12.56	13.015
	G2	14.885	13.435	13.505
	G3	15.485	13.45	14.11
	G4	15.62	13.52	14.095
	G5	14.195	11.17	12.065
	G6	13.71	12.765	13.22
	G7	15.045	11.655	13.185
	G8	14.485	11.74	12.405
	G9	13.52	14.815	14.925
	G10	13.775	11.875	11.86
	G11	14.145	14.15	13.425
	G12	12.845	12.85	13.15
	G13	15.435	12.535	12.07
	G14	14.215	14.735	14.175
	G15	13.935	11.56	10.625
	G16	14.335	11.95	12.46
E2	G1	15.3	16.56	15.52
	G2	15.82	16.82	17.04
	G3	17.12	16.5	16.5
	G4	17.64	17.28	17.08
	G5	16.42	15.62	16.6
	G6	16.28	17.7	16.24
	G7	16.52	15.56	15.72
	G8	16.6	17	16.78
	G9	15.9	15.64	15.84
	G10	16.02	17.26	16.58
	G11	15.7	16.62	15.42
	G12	16.36	15.66	16.14
	G13	15.36	15.92	15.52
	G14	16.48	16.94	17.08
	G15	15.66	15.74	15.82
	G16	15.54	15.24	16.92
E3	G1	16	16.4	17.3
	G2	16.2	16.3	16.8
	G3	18.8	17.5	18.3
	G4	17.7	17.3	17.8
	G5	18.2	17.9	17.7
	G6	17.3	16.7	18.4
	G7	18.9	17.3	17.3
	G8	16.8	17.4	17.1
	G9	15.9	17.7	16.4
	G10	16.2	16.4	17.2
	G11	17.1	17.5	16.8
	G12	16.7	15.7	16.4
	G13	16.8	15.5	16.4
	G14	17.9	18.9	19
	G15	17.3	16.8	18.1
	G16	16.6	16.2	16.8
E4	G1	13.545	14.2	14.795
	G2	14.885	16.545	15.675
	G3	15.485	15.25	16.02
	G4	15.62	16.455	16.06
	G5	14.195	13.93	12.535
	G6	13.71	13.18	13.845
	G7	15.045	15.05	13.59
	G8	14.485	12.815	13.685
	G9	13.52	13.905	12.625
	G10	13.775	14.21	13.615
	G11	14.145	14.73	14.355
	G12	12.845	13.89	14.83
	G13	15.435	15.77	15.71
	G14	14.215	14.625	14.185
	G15	13.935	14.25	13.51
	G16	14.335	13.25	14.215
E5	G1	15.99	16.54	17.42
	G2	17.69	17.88	18.24
	G3	17.55	17.63	17.54
	G4	16.31	16.55	15.8
	G5	18.37	18.45	18.79
	G6	17.56	18.01	18.4
	G7	16.88	17.57	17.42
	G8	16.97	17.22	17.6
	G9	16.68	16.66	16.43
	G10	17.88	17.54	16.34
	G11	16.55	16.09	16.52
	G12	16.8	17.74	16.35
	G13	17.48	15.92	16.52
	G14	19.44	18.84	18.45
	G15	17.11	17.2	17.99
	G16	18.25	17.6	17.11
E6	G1	16.06	16.26	15.5
	G2	15.88	15.2	15.82
	G3	16.78	15.78	15.02
	G4	16	15.48	14.88
	G5	17.38	17.6	15.2
	G6	14.88	15.38	14.32
	G7	17.06	17.32	16.5
	G8	15.38	14.12	15.06
	G9	15.98	15.92	15.84
	G10	15.52	15.4	15.14
	G11	15.5	15.44	14.82
	G12	15.96	16.48	15.42
	G13	16.14	15.76	14.84
	G14	16.02	16.36	15.76
	G15	16.14	17.02	16.7
	G16	16.38	16.12	15.84
E7	G1	15.72	16.2	17.72
	G2	14.68	14.6	14.92
	G3	15.54	15.62	14.9
	G4	15.75	15.32	15.58
	G5	14	14.76	17.1
	G6	16.44	16.14	15.94
	G7	17.4	18.01	17.83
	G8	14.7	15.26	14.86
	G9	15.08	15.52	14.72
	G10	15.66	14.86	14.8
	G11	15.42	14.28	15.4
	G12	16.74	14.24	15.04
	G13	14.78	14.2	14.86
	G14	16	15.94	17.76
	G15	14.78	15.6	16.1
	G16	15.56	14.94	15.74
